# Supplementary material for: SiMMap: a web server for inferring site-moiety map to recognize interaction preferences between protein pockets and compound moieties
Source: PubMed Central journal article supplement — Nucleic Acids Res. 2010 Jun 2;38(Web Server issue):W424–30. doi: 10.1093/nar/gkq480 (PMC2896162; doi:10.1093/nar/gkq480), 2010-06-02
Supplement: gkq480_1.pdf [file gkq480_1.pdf]

**Table S1.** The relationship between the anchors and moieties of 15 co-crystallized ligands for TK

| PDB code | Compound structure | Anchor                                                                   |      |                                                                           |                 |
|----------|--------------------|--------------------------------------------------------------------------|------|---------------------------------------------------------------------------|-----------------|
|          |                    | E1                                                                       | H1   | H2                                                                        | V1              |
| 3vtk     |                    | $\text{RO}-\overset{\text{O}}{\underset{\text{OH}}{\text{P}}}-\text{OH}$ | R-OH | $\text{R}-\overset{\text{O}}{\underset{\text{R}_2}{\text{N}}}-\text{R}_1$ |                 |
| 1vtk     |                    | $\text{RO}-\overset{\text{O}}{\underset{\text{OH}}{\text{P}}}-\text{OH}$ | R-OH | $\text{R}-\overset{\text{O}}{\underset{\text{R}_2}{\text{N}}}-\text{R}_1$ |                 |
| 1p7c     |                    | $\text{RO}-\overset{\text{O}}{\underset{\text{OH}}{\text{P}}}-\text{OH}$ | R-OH | $\text{R}-\overset{\text{O}}{\underset{\text{R}_2}{\text{N}}}-\text{R}_1$ |                 |
| 1of1     |                    |                                                                          | R-OH | $\text{R}-\overset{\text{O}}{\underset{\text{R}_2}{\text{N}}}-\text{R}_1$ |                 |
| 1ki6     |                    |                                                                          | R-OH | $\text{R}-\overset{\text{O}}{\underset{\text{R}_2}{\text{N}}}-\text{R}_1$ |                 |
| 1ki8     |                    |                                                                          | R-OH | $\text{R}-\overset{\text{O}}{\underset{\text{R}_2}{\text{N}}}-\text{R}_1$ |                 |
| 1e2k     |                    |                                                                          | R-OH | $\text{R}-\overset{\text{O}}{\underset{\text{R}_2}{\text{N}}}-\text{R}_1$ |                 |
| 1ki7     |                    |                                                                          | R-OH | $\text{R}-\overset{\text{O}}{\underset{\text{R}_2}{\text{N}}}-\text{R}_1$ |                 |
| 1ki4     |                    |                                                                          | R-OH | $\text{R}-\overset{\text{O}}{\underset{\text{R}_2}{\text{N}}}-\text{R}_1$ |                 |
| 1kim     |                    |                                                                          | R-OH | $\text{R}-\overset{\text{O}}{\underset{\text{R}_2}{\text{N}}}-\text{R}_1$ |                 |
| 1e2p     |                    |                                                                          | R-OH | $\text{R}-\overset{\text{O}}{\underset{\text{R}_2}{\text{N}}}-\text{R}_1$ |                 |
| 1ki3     |                    |                                                                          | R-OH | $\text{R}-\overset{\text{O}}{\underset{\text{R}_2}{\text{N}}}-\text{R}_1$ | Aromatic moiety |
| 1ki2     |                    |                                                                          | R-OH | $\text{R}-\overset{\text{O}}{\underset{\text{R}_2}{\text{N}}}-\text{R}_1$ | Aromatic moiety |
| 1qhi     |                    |                                                                          | R-OH | R-NH <sub>2</sub>                                                         | Aromatic moiety |
| 2ki5     |                    |                                                                          | R-OH | R-NH <sub>2</sub>                                                         | Aromatic moiety |

**Table S2.** Comparing SiMMap with other methods on thymidine kinase and estrogen receptor by false-positive rates

| True positive (%) | Thymidine kinase (TK) |                   |                    |                   | Estrogen receptor (ER) |                   |                    |                   |
|-------------------|-----------------------|-------------------|--------------------|-------------------|------------------------|-------------------|--------------------|-------------------|
|                   | SiMMap                | DOCK <sup>a</sup> | FlexX <sup>a</sup> | GOLD <sup>a</sup> | SiMMap                 | DOCK <sup>a</sup> | FlexX <sup>a</sup> | GOLD <sup>a</sup> |
| 80                | 6.3 <sup>b</sup>      | 23.4              | 8.8                | 8.3               | 1.1                    | 13.3              | 57.8               | 5.3               |
| 90                | 6.8                   | 25.5              | 13.3               | 9.1               | 1.1                    | 17.4              | 70.9               | 8.3               |
| 100               | 6.8                   | 27                | 19.4               | 9.3               | 7.5                    | 18.9              | NA                 | 23.4              |

<sup>a</sup> Summarized from Bissantz *et al.* (20)

<sup>b</sup> The false-positive rate (%) is obtained based on 1000 compounds.

**Table S3.** The mapping between the anchors and 10 active and some typical compounds for TK

| Compound     | Structure | GEMDOCK rank | SiMMap rank | SiMMap score | E1               | H1                      | H2                      | V1    |
|--------------|-----------|--------------|-------------|--------------|------------------|-------------------------|-------------------------|-------|
| TK_01        |           | 89           | 57          | 3.253        |                  | R-OH                    | $R^1-C(=O)-N(R^2)(R^3)$ |       |
| TK_02        |           | 182          | 76          | 3.233        |                  | R-OH                    | $R^1-C(=O)-N(R^2)(R^3)$ |       |
| TK_03        |           | 127          | 67          | 3.243        |                  | $R^1-C(=O)-N(R^2)(R^3)$ | $R^1-C(=O)-N(R^2)(R^3)$ |       |
| TK_04        |           | 122          | 65          | 3.244        |                  | R-OH                    | $R^1-C(=O)-N(R^2)(R^3)$ |       |
| TK_05        |           | 46           | 39          | 3.262        |                  | R-OH                    | $R^1-C(=O)-N(R^2)(R^3)$ |       |
| TK_06        |           | 42           | 36          | 3.263        |                  | R-OH                    | $R^1-C(=O)-N(R^2)(R^3)$ |       |
| TK_07        |           | 75           | 53          | 3.255        |                  | R-OH                    | $R^1-C(=O)-N(R^2)(R^3)$ |       |
| TK_08        |           | 68           | 52          | 3.256        |                  | R-OH                    | $R^1-C(=O)-N(R^2)(R^3)$ |       |
| TK_09        |           | 181          | 77          | 3.233        |                  | R-OH                    | $R^1-C(=O)-N(R^2)(R^3)$ |       |
| TK_10        |           | 148          | 70          | 3.239        |                  | R-OH                    | $R^1-C(=O)-N(R^2)(R^3)$ |       |
| MFCD00005750 |           | 8            | 1           | 4.283        | $RO-P(=O)(OH)_2$ | R-OH                    | $R^1-C(=O)-N(R^2)(R^3)$ |       |
| MFCD00005753 |           | 19           | 3           | 4.271        | $RO-P(=O)(OH)_2$ | R-OH                    | $R^1-C(=O)-N(R^2)(R^3)$ |       |
| MFCD00005763 |           | 87           | 9           | 4.253        | $RO-P(=O)(OH)_2$ | R-OH                    | $R^1-C(=O)-N(R^2)(R^3)$ |       |
| MFCD00011393 |           | 4            | 384         | 1.295        | $RO-P(=O)(OH)_2$ |                         |                         |       |
| MFCD00003569 |           | 9            | 118         | 2.281        |                  |                         | $R^1-C(=O)-N(R^2)(R^3)$ | Other |

Table S4. The mapping between the anchors and 10 active and some typical compounds for ER

| Compound     | Structure                                                                           | GEMDOCK rank | SiMMap rank | SiMMap score | H1                                                                                  | V1                                                                                                       | V2                                                                                    | V3                                                                                                       |
|--------------|-------------------------------------------------------------------------------------|--------------|-------------|--------------|-------------------------------------------------------------------------------------|----------------------------------------------------------------------------------------------------------|---------------------------------------------------------------------------------------|----------------------------------------------------------------------------------------------------------|
| EST_01       | 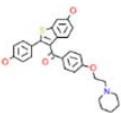   | 2            | 1           | 4.239        | R-OH                                                                                | <br>Aromatic moiety   |    |                       |
| EST_02       |    | 32           | 19          | 4.216        | R-OH                                                                                | <br>Aromatic moiety   |    |                       |
| EST_03       |    | 28           | 16          | 4.217        | R-OH                                                                                |                        |    |                       |
| EST_04       |    | 8            | 5           | 4.226        | R-OH                                                                                | <br>Aromatic moiety   |    | <br>Aromatic moiety   |
| EST_05       |    | 6            | 4           | 4.228        |    | <br>Aromatic moiety   |    |                       |
| EST_06       |    | 3            | 2           | 4.238        | R-OH                                                                                | <br>Aromatic moiety   |    |                       |
| EST_07       |  | 21           | 13          | 4.218        |   | <br>Aromatic moiety   |    | Other                                                                                                    |
| EST_08       |  | 10           | 7           | 4.225        | R-OH                                                                                | Other                                                                                                    |  | Other                                                                                                    |
| EST_09       |  | 30           | 20          | 4.216        | R-OH                                                                                | <br>Aromatic moiety |  | <br>Aromatic moiety |
| EST_10       |  | 246          | 84          | 4.193        | R-OH                                                                                | <br>Aromatic moiety |  |                     |
| MFCD00002206 |  | 4            | 3           | 4.232        |  | Other                                                                                                    |  |                     |
| MFCD00012748 |  | 17           | 11          | 4.221        | R-OH                                                                                | Other                                                                                                    |  |                     |
| MFCD00004690 |  | 5            | 154         | 3.23         | R-OH                                                                                |                                                                                                          | Other                                                                                 | Other                                                                                                    |
| MFCD00013089 |  | 25           | 617         | 2.218        |  |                                                                                                          |                                                                                       |                     |

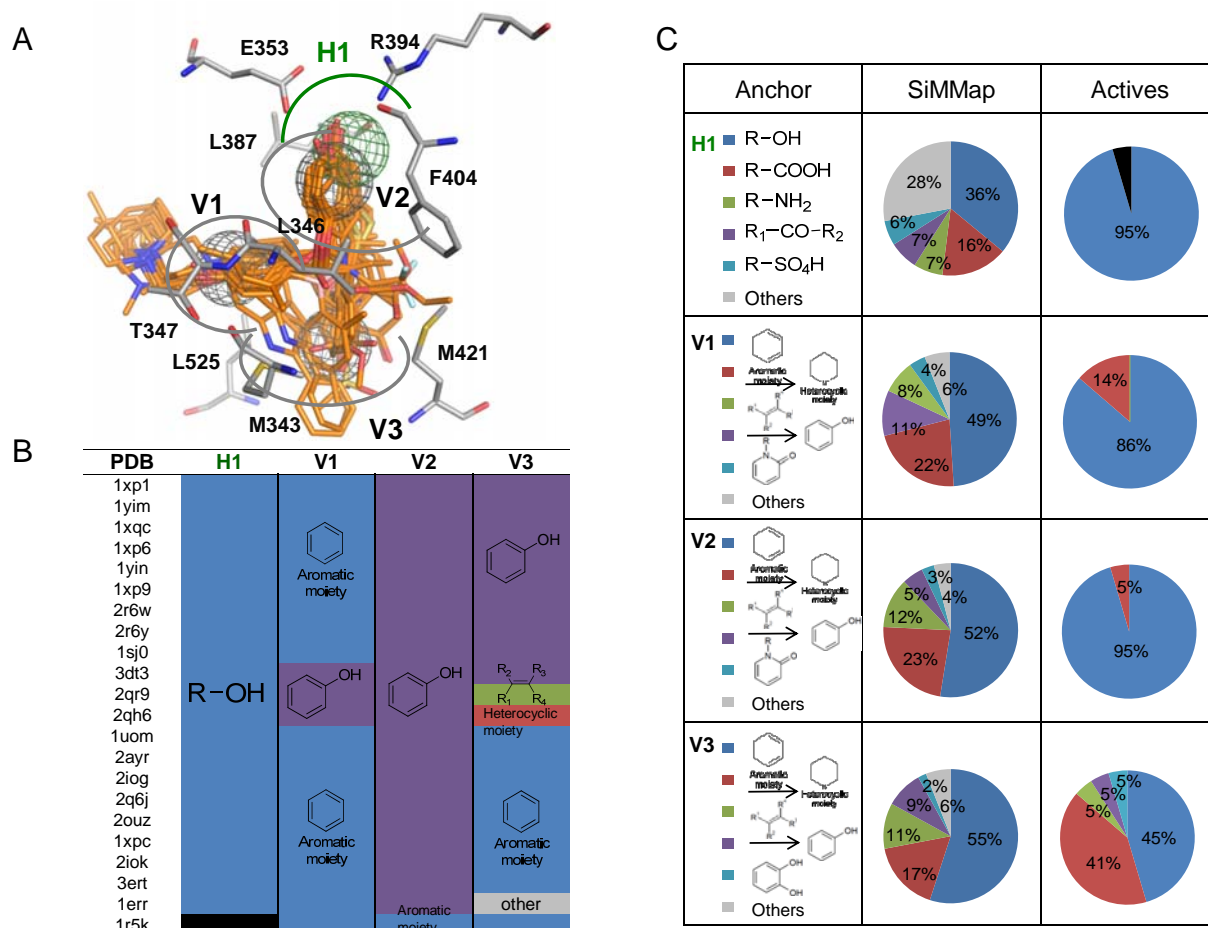

**Figure S1.** The relationships between the site-moiety map and 22 co-crystallized ligands of ER. (A) The mapping between four inferred anchors (binding pocket with conserved interacting residues) and these 22 ligands in the active site. (B) The moieties of these 22 ligands in each anchor. Black cell presents that the moiety of the compound does not agree with the anchor H1. (C) The moiety compositions of 1000 docked compounds (SiMMap) and these 22 ligands.

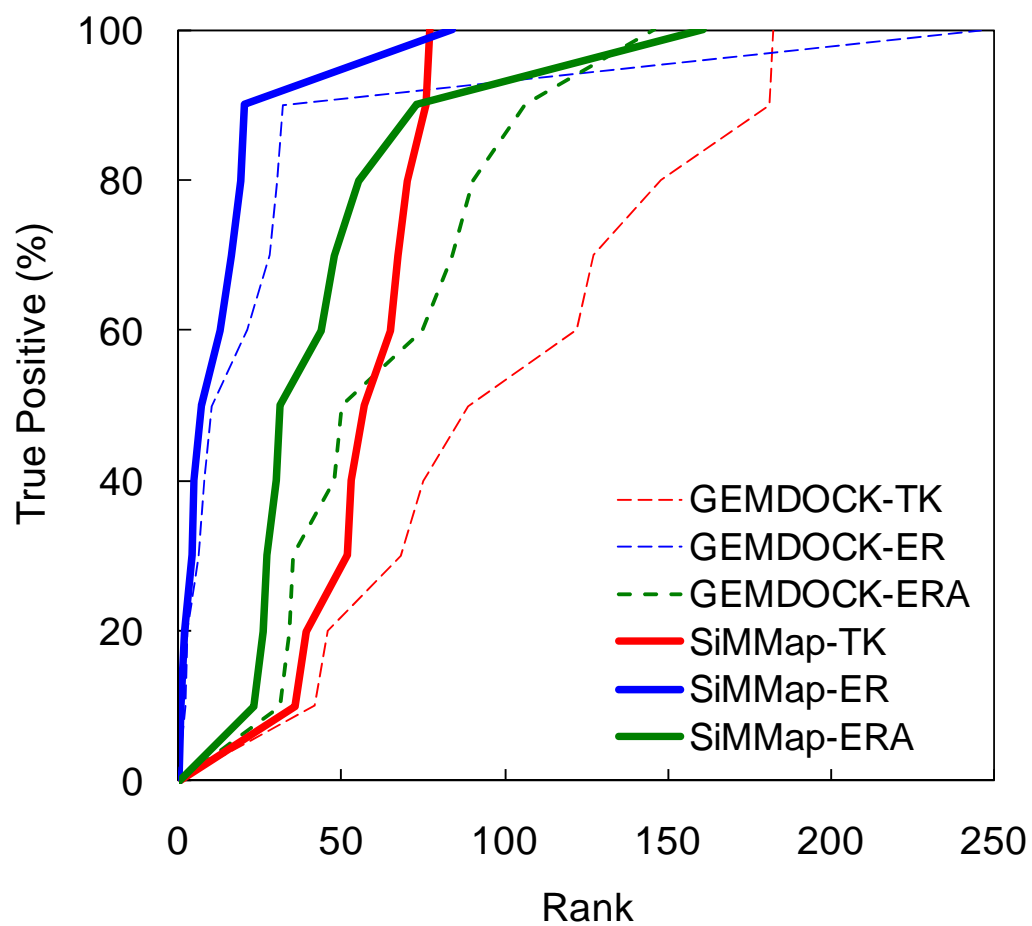

Figure S2. Comparison of SiMMap with GEMDOCK. The SiMMap server (solid lines) consistently outperforms GEMDOCK (dash lines) on three targets: TK (red), ER (blue) and ERA (green).
